# Supplementary material
Source: MDPI journal article supplement (https://www.mdpi.com/2072-4292/11/24/2995)
Supplement: s1 [file s1]

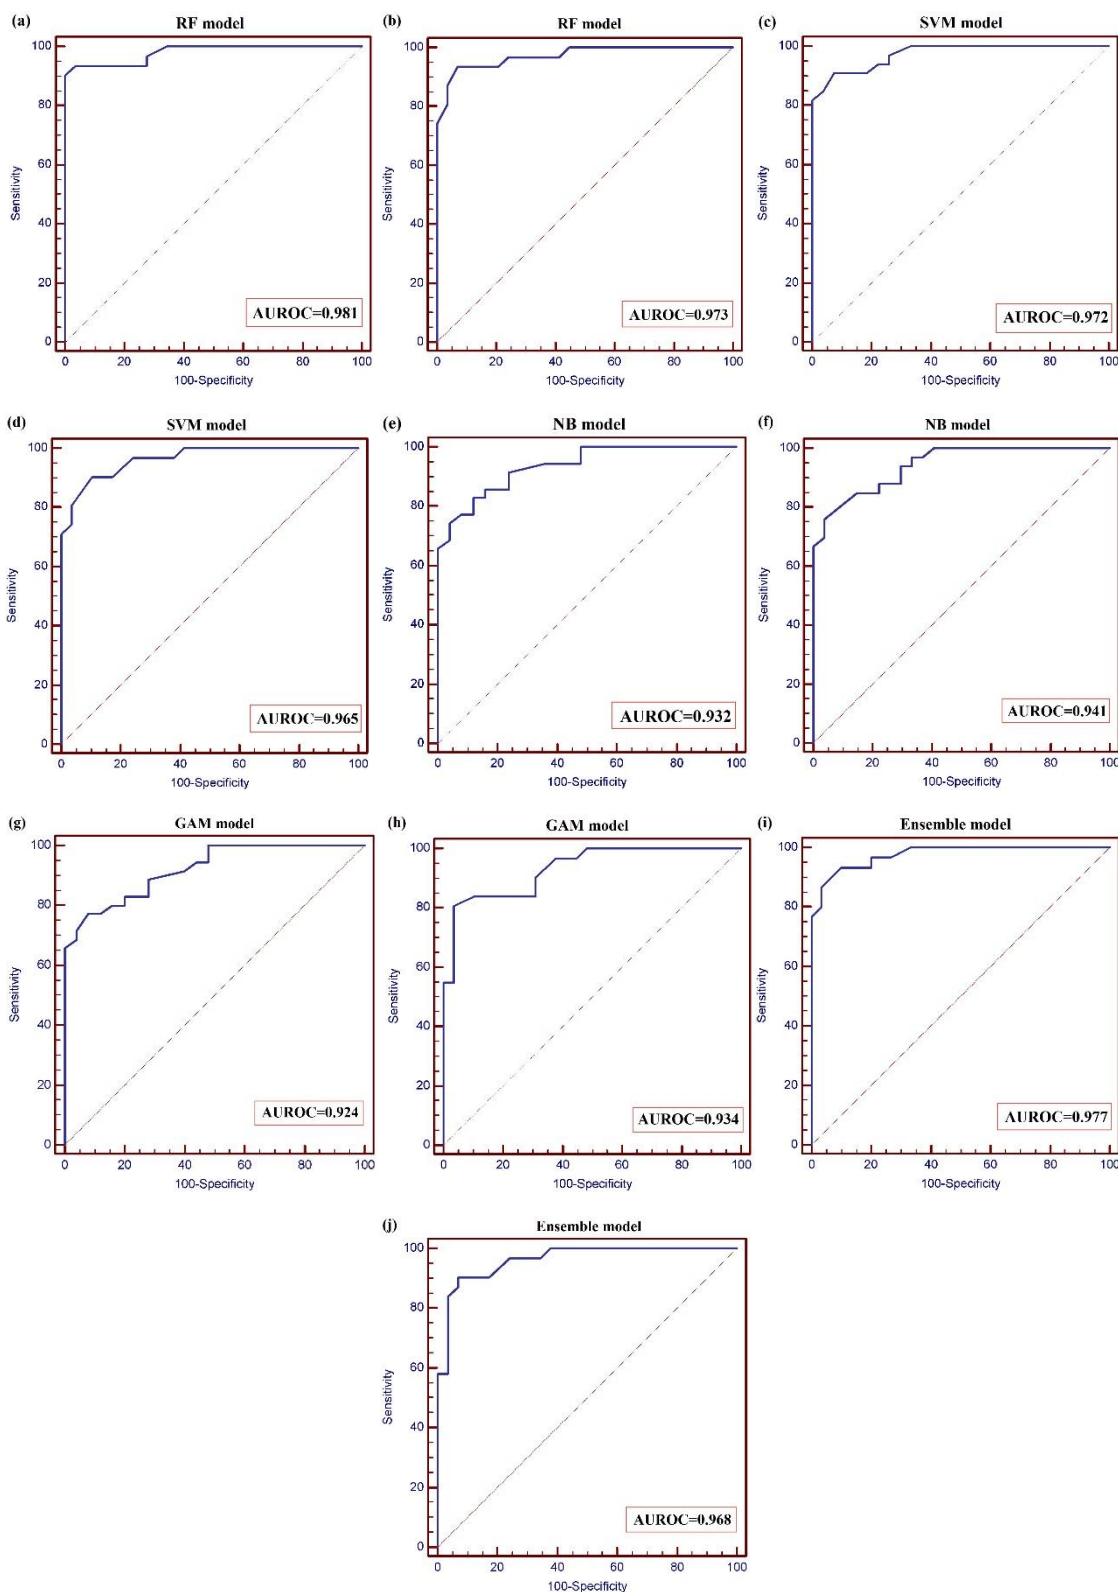

**Figure S1.** ROC curves in goodness-of-fit: a) RF in Darvan, b) RF in Zarinehroud, c) SVM in Darvan, d) SVM in Zarinehroud, e) NB in Darvan, f) NB in Zarinehroud, g) GAM in Darvan, h) GAM in Zarinehroud, i) the ensemble model in Darvan, and j) the ensemble model in Zarinehroud

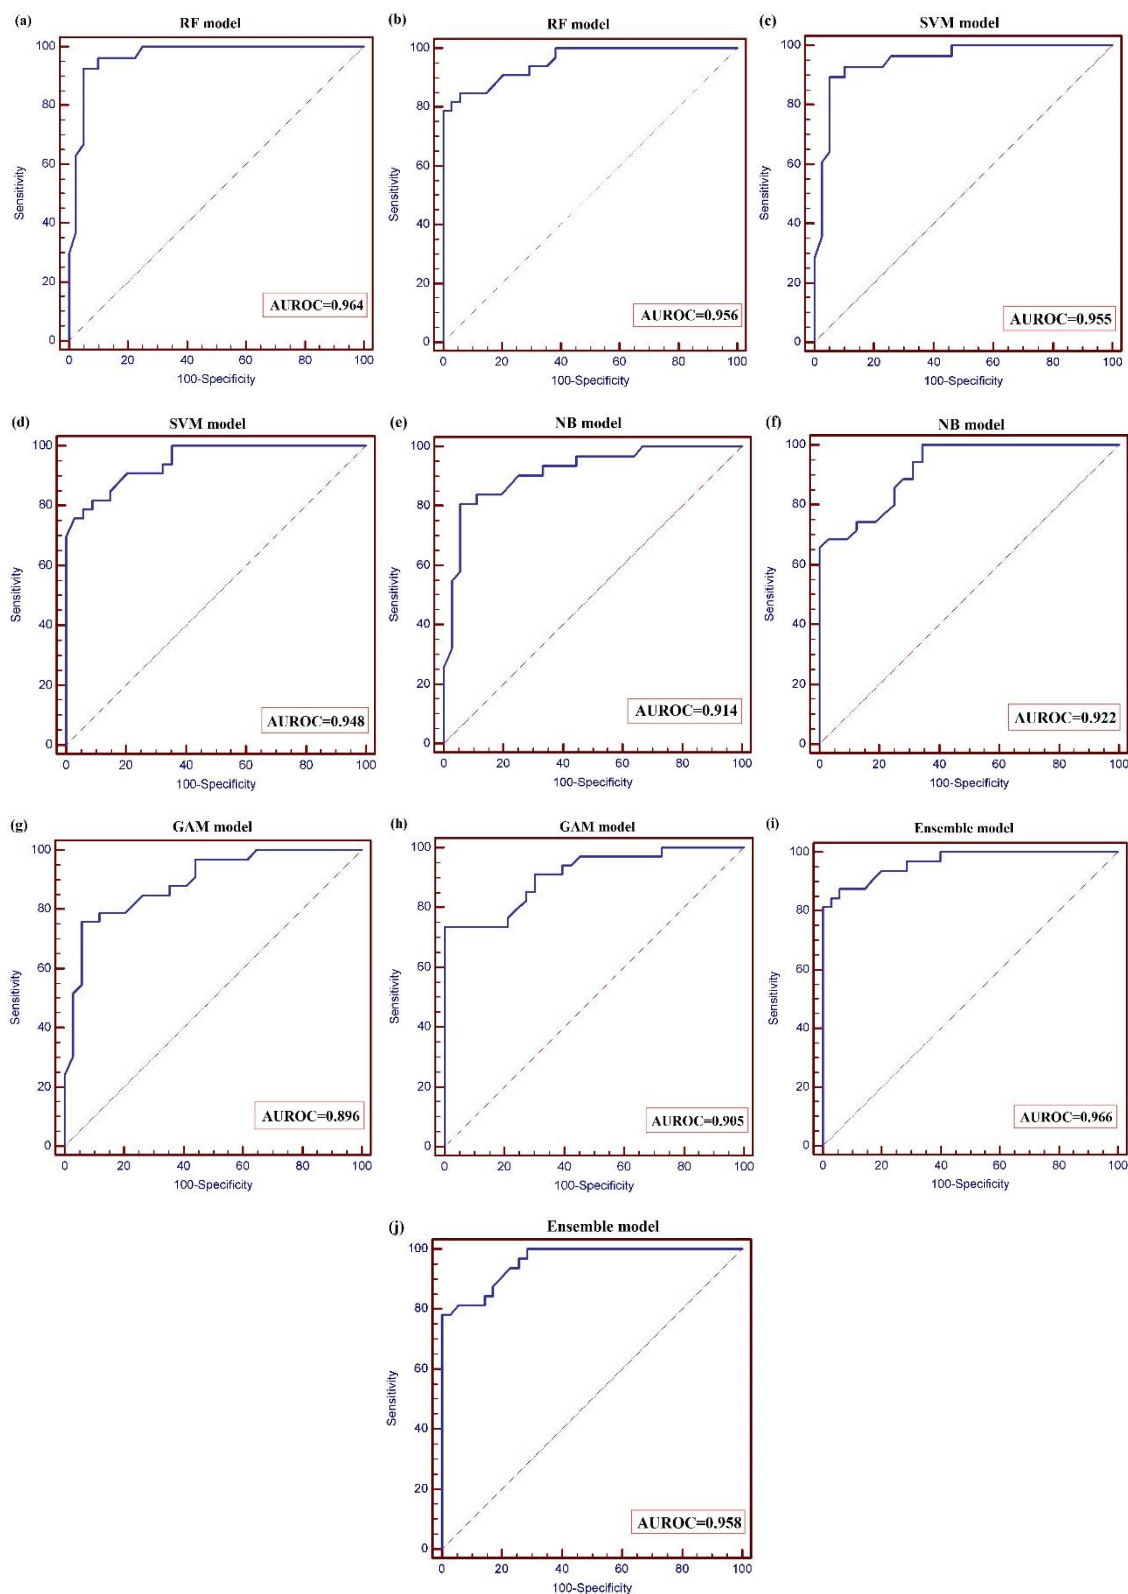

**Figure S2.** ROC curves in predictive performance: a) RF in Darvan, b) RF in Zarinehroud, c) SVM in Darvan, d) SVM in Zarinehroud, e) NB in Darvan, f) NB in Zarinehroud, g) GAM in Darvan, h) GAM in Zarinehroud, i) the ensemble model in Darvan, and j) the ensemble model in Zarinehroud
